# Supplementary material for: The effect of Robertsonian translocations on the intranuclear positioning of NORs (nucleolar organizing regions) in human sperm cells
Source: PubMed Central journal article supplement (PMC6379386; doi:10.1038/s41598-019-38478-x), 2019-02-18
Supplement: 41598_2019_38478_MOESM1_ESM.pdf [file 41598_2019_38478_MOESM1_ESM.pdf]

# The effect of Robertsonian translocations on the intranuclear positioning of NORs (nucleolar organizing regions) in human sperm cells

Ewa Wiland<sup>1</sup>, Marta Olszewska<sup>1</sup>, Nataliya Huleyuk<sup>2</sup>, Vyacheslav B. Chernykh<sup>3</sup> & Maciej Kurpisz<sup>1\*</sup>

<sup>1</sup>Institute of Human Genetics, Polish Academy of Sciences, Poznan, Poland

<sup>2</sup>Institute of Hereditary Pathology, Ukrainian Academy of Medical Sciences, Lviv, Ukraine

<sup>3</sup>Research Centre for Medical Genetics, Russian Academy of Medical Sciences, Moscow, Russian Federation.

\*Corresponding author: M.K. e-mail: [kurpimac@man.poznan.pl](mailto:kurpimac@man.poznan.pl);

first author email: [ewila@man.poznan.pl](mailto:ewila@man.poznan.pl)).

Running Title: Topology of NORs in spermatozoa of Robertsonian carriers.

Key words: NOR distribution in human sperm cells, Robertsonian translocation, meiotic segregation pattern.

**Supplementary Table S1.** Semen assessment of three Robertsonian translocation carriers (R1, R2 and R3) and the control volunteer with normal karyotype.

| No.                          | Karyotype                    | Spermiogram (according to WHO, 2010) <sup>63</sup>                                                        | Reproductive history |
|------------------------------|------------------------------|-----------------------------------------------------------------------------------------------------------|----------------------|
| R1                           | 45,XY,rob(13;22)(q10;q10)mat | OA*: concentration 2.0; motility <30; normal forms >14                                                    | lack of conception   |
| R2                           | 45,XY,rob(13;15)(q10;q10)mat | OA: concentration: 3.2; motility: 26; normal forms: 9                                                     | lack of conception   |
| R3                           | 45,XY,rob(13;14)(q10;q10)    | OA: concentration: 8.3; motility: 24; normal forms: 5.5                                                   | lack of conception   |
| Control                      | 46,XY                        | N: concentration: 60; motility: 55; normal forms: >14                                                     | fertile              |
| WHO <sup>62</sup> guidelines | 46,XY                        | Concentration ( $10^6$ /ml): $\geq 15$ ; Progressive motility (%): $\geq 32$ ; Normal forms (%): $\geq 4$ |                      |

\*OA = oligoastenozoospermia; N = normozoospermia.

**Supplementary Figure S1.** The representative images of NORs localizations (recognized as FISH signals) according to schemes No. 1 – 23 in Table 6. The nuclei were stained with DAPI, and the NORs are stained with Texas Red. Chromosome centromere 7 was stained with FITC (green) (as the control of FISH efficiency).

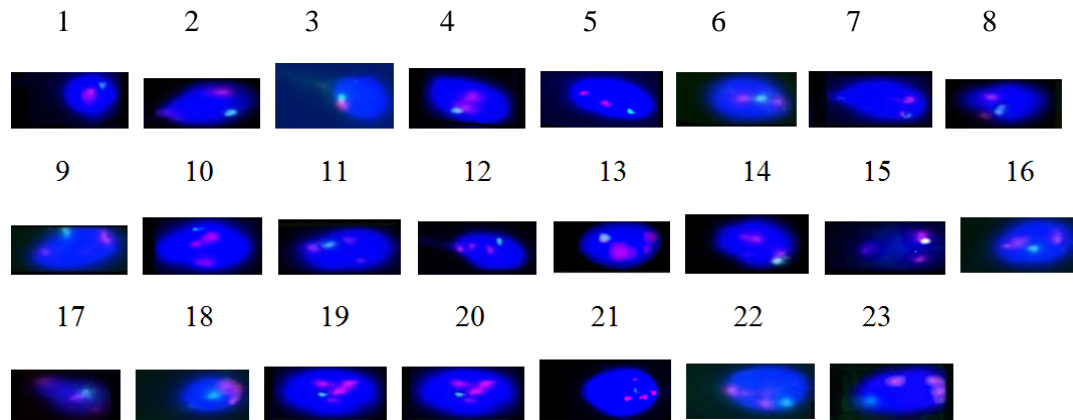

**Supplementary Figure S2.** Distribution of NORs in the sperm cell nuclei from Robertsonian carriers R1, R2 and R3 and from the Control. **A.** The dispersion (over the nucleus) of NORs (recognized as discrete FISH signals) in all of the analysed sperm cells. **B.** Number of observed discrete NOR signals in the marked radial areas of the sperm nucleus. **C.** Percentage (%) of discrete NOR signals in the marked radial areas (detailed view compared to Figure 2 and Table 7).

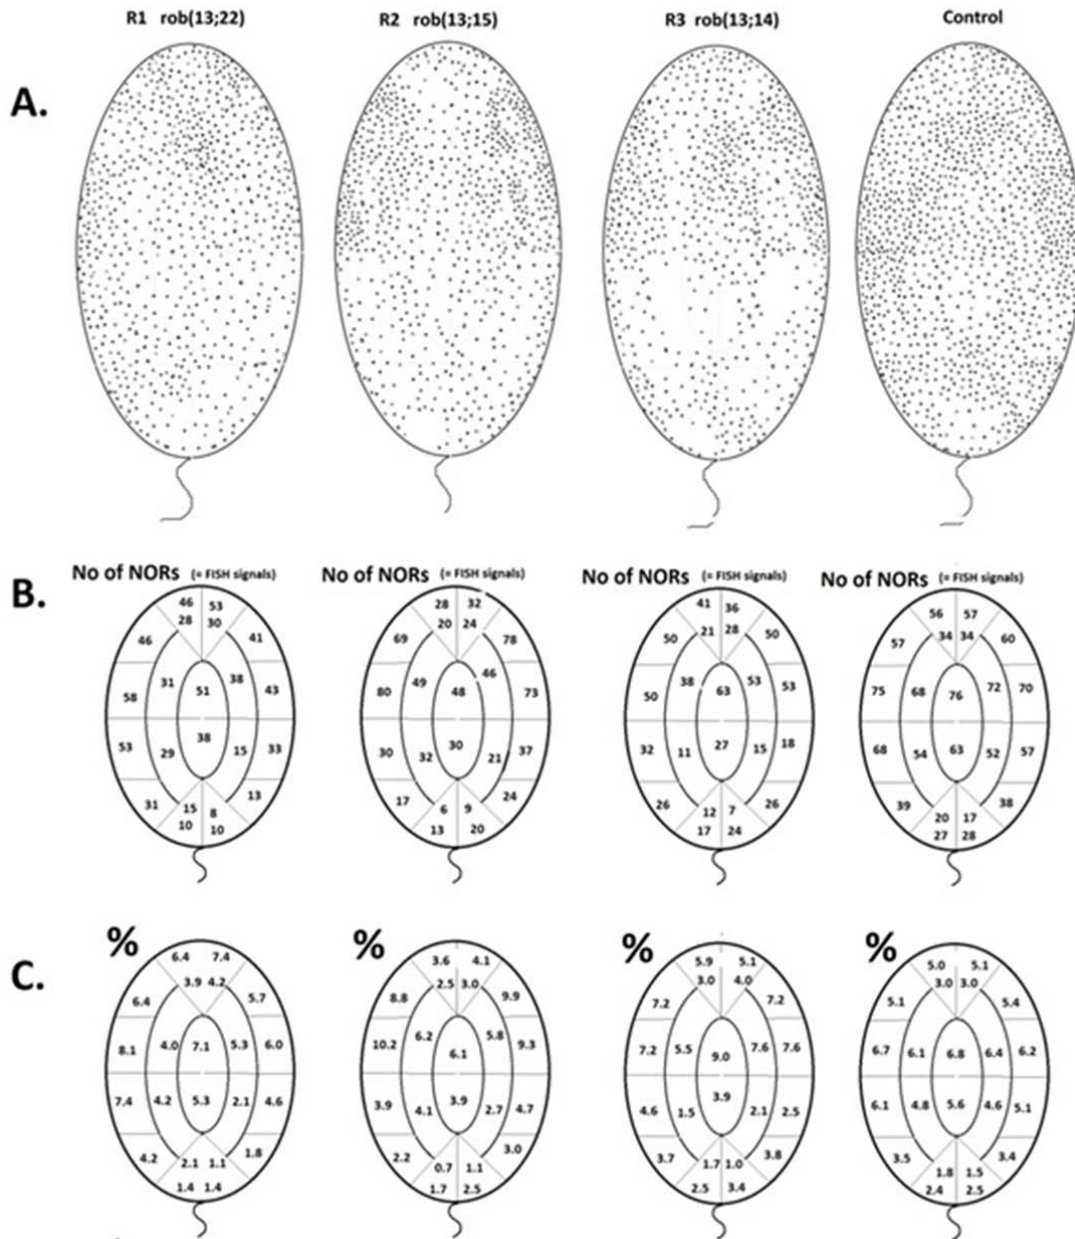

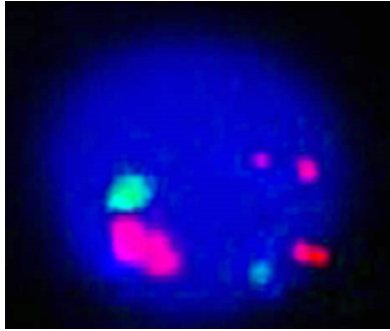

**Supplementary Figure S3.** Clustering of NORs in a diploid cell (leukocyte) from the control volunteer with normal karyotype . In the representative image of FISH, the nucleus is stained with DAPI and the NORs are stained with Texas Red. Chromosome centromere 7 was stained with FITC (green) (as the control of FISH efficiency).
